# Supplementary material for: Diversity of the virome associated with alfalfa (Medicago sativa L.) in the U.S. Pacific Northwest
Source: PubMed Central journal article supplement (PMC9130302; doi:10.1038/s41598-022-12802-4), 2022-05-24

## **Supplementary Figure 1**

**Original full-length images of the gels shown in Figure 3 of the main text.**

**(These images were cropped to combine and fit them in one figure)**

Figure 3A. RT-PCR detection of cherry virus Trakiya, alfalfa strain

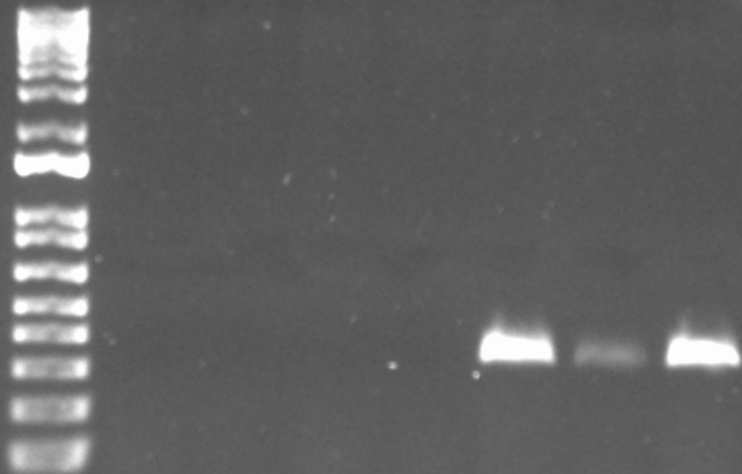

Figure 3B. RT-PCR detection of hop latent virus

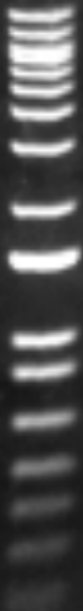

Figure 3C. RT-PCR detection of potato virus X

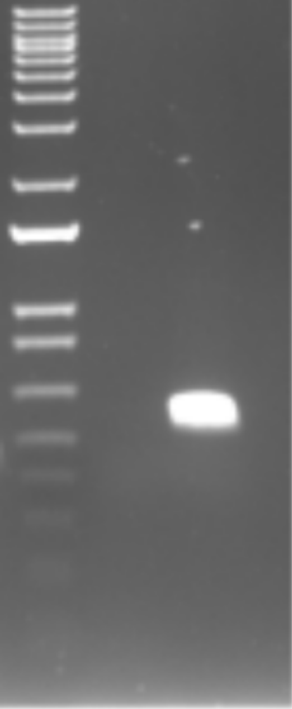

Figure 3D. RT-PCR detection of alfalfa nucleorhabdovirus 1

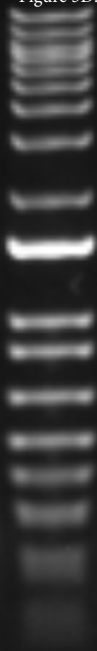

Supplement: 41598_2022_12802_MOESM1_ESM.pdf [file 41598_2022_12802_MOESM1_ESM.pdf]
