# Supplementary material for: Diversity of the virome associated with alfalfa (Medicago sativa L.) in the U.S. Pacific Northwest
Source: PubMed Central journal article supplement (PMC9130302; doi:10.1038/s41598-022-12802-4), 2022-05-24
Supplement: 41598_2022_12802_MOESM6_ESM.pdf [file 41598_2022_12802_MOESM6_ESM.pdf]

## Supplementary Table 5

### Putative contaminant viruses

| <b>Virus name</b>                       | <b>Host</b>             |
|-----------------------------------------|-------------------------|
| Ancient Northwest Territories cripvirus | Mammals                 |
| Aphis glycines virus 1                  | Soybean aphid           |
| Bombus-associated virus Pic2            | Bumblebee               |
| Bundaberg bee virus 8                   | Honeybee                |
| Diabrotica virgifera virgifera virus 2  | Western Corn Rootworm   |
| Faecal-associated gemycircularvirus     | Mammals, birds          |
| Hubei toti-like virus 2                 | Arthropoda              |
| HVAC-associated RNA virus 1             | Indoor Air              |
| Kilifi Virus                            | Drosophilidae           |
| La Jolla virus                          | Drosophila melanogaster |
| Lasius niger virus 1                    | Black garden ant        |
| Luckshill virus                         | Drosophila suzukii      |
| Neofusicoccum parvum narnavirus 1       | Phytopathogenic fungus  |
| Nesidiocoris tenuis iflavirus 1         | Hemiptera               |
| River Liunaeg virus                     | Bumblebee               |
| Solenopsis invicta virus 7              | Fire ant                |
